# Supplementary material
Source: publisher figshare collection journal article supplement (https://geolsoc.figshare.com/ndownloader/files/25778063)

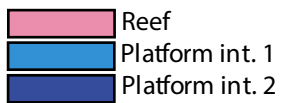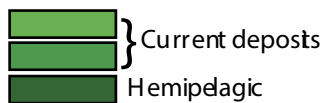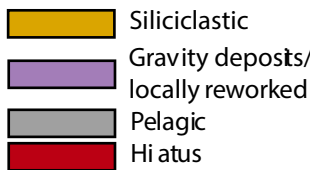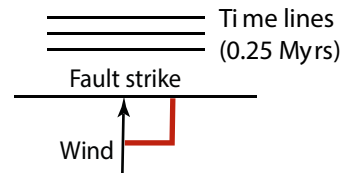

Model Run 23: slip rate

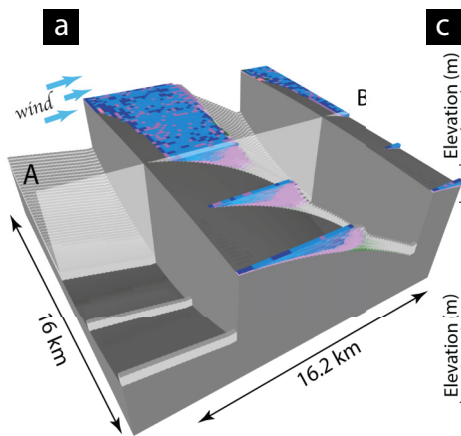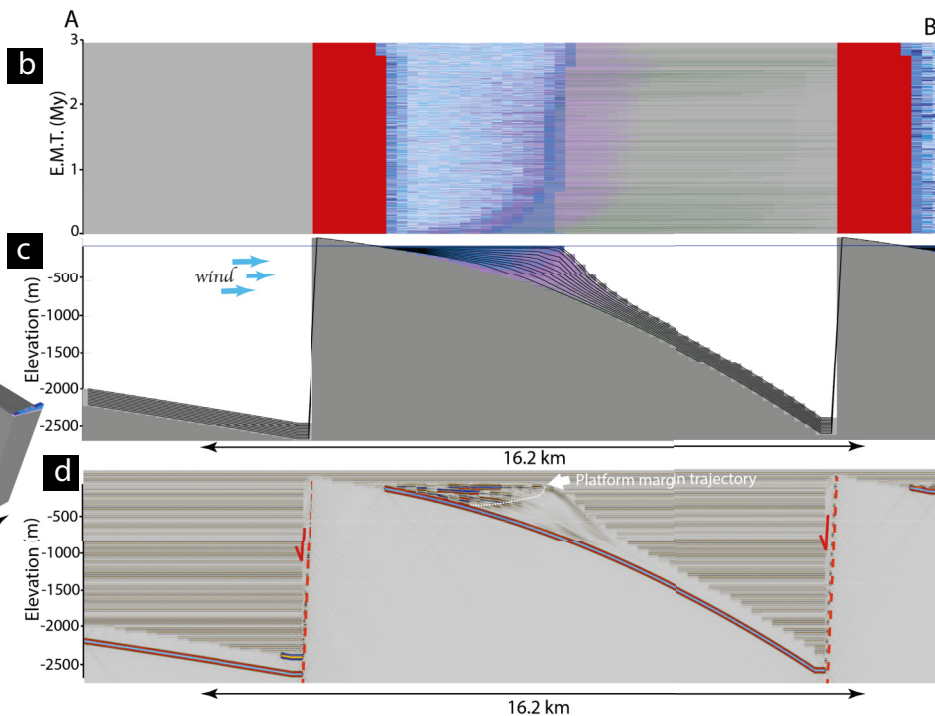

Model Run 24: wind direction

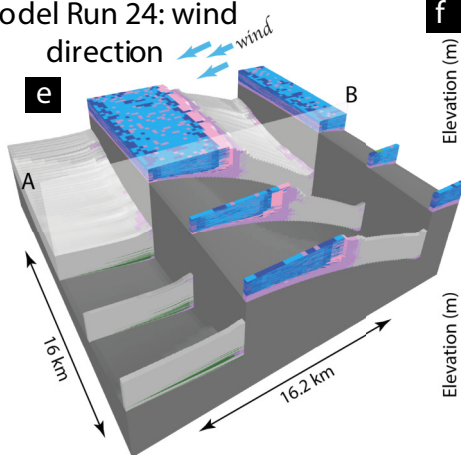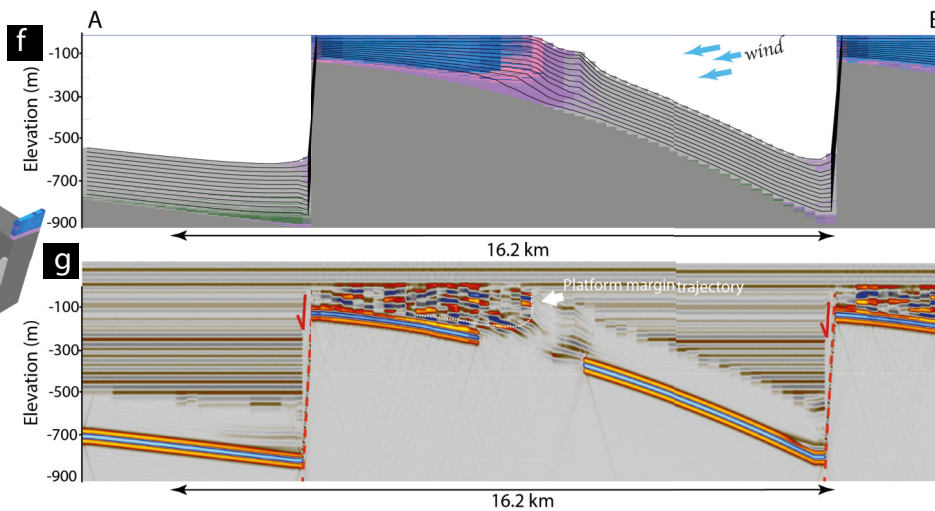

Supplement: Supplementary file 1 [file 25778063]
